# Supplementary material for: Fluorinated Iron(ii) clathrochelate units in metalorganic based copolymers: improved porosity, iodine uptake, and dye adsorption properties
Source: Royal Society of Chemistry journal article supplement (doi:10.1039/d1ra02357h), 2021-01-01
Supplement: d1ra02357h1.pdf [file d1ra02357h1.pdf]

## Supplementary Information

# Fluorinated Iron(II) Clathrochelate Units in Metalorganic Based Copolymers: Improved Porosity, Iodine Uptake, and Dye Adsorption Properties

Suchetha Shetty,<sup>a,b</sup> Noorullah Baig,<sup>a,b</sup> Atikur Hassan<sup>c</sup> Saleh Al-Mousawi,<sup>d</sup> Neeladri Das,<sup>c</sup> and Bassam Alameddine\*<sup>a,b</sup>

<sup>a</sup>Department of Mathematics and Natural Sciences, Gulf University for Science and Technology, Kuwait.

<sup>b</sup> Functional Materials Group – CAMB, GUST, Kuwait.

<sup>c</sup>Department of Chemistry, Indian Institute of Technology Patna, Patna 801106, Bihar, India.

<sup>d</sup>Department of Chemistry, University of Kuwait, Kuwait.

## Contents

|                                                                          |                |
|--------------------------------------------------------------------------|----------------|
| <sup>1</sup> H NMR spectra of <b>CC2</b> and <b>CC3</b>                  | Figure S1, S2  |
| <sup>13</sup> C NMR spectra of <b>CC2</b> , <b>CC3</b> and <b>CCP3</b>   | Figure S3-S5   |
| EI-HRMS spectrum of <b>CC2</b>                                           | Figure S6      |
| EI-HRMS spectrum of <b>CC3</b>                                           | Figure S7      |
| FTIR spectra of <b>CCP1,2,4,5</b>                                        | Figure S8-S11  |
| High-resolution XPS spectra of <b>CCP1,2,4,5</b>                         | Figure S12-S15 |
| UV-Vis absorption spectra of I <sub>2</sub> @ <b>CCP1,3-5</b> in ethanol | Figure S16-S19 |
| UV-Vis absorption spectra of MB & MEB in <b>CCP1,3-5</b>                 | Figure S20-S27 |

---

\*Corresponding author. *E-mail address*: [alameddine.b@gust.edu.kw](mailto:alameddine.b@gust.edu.kw)

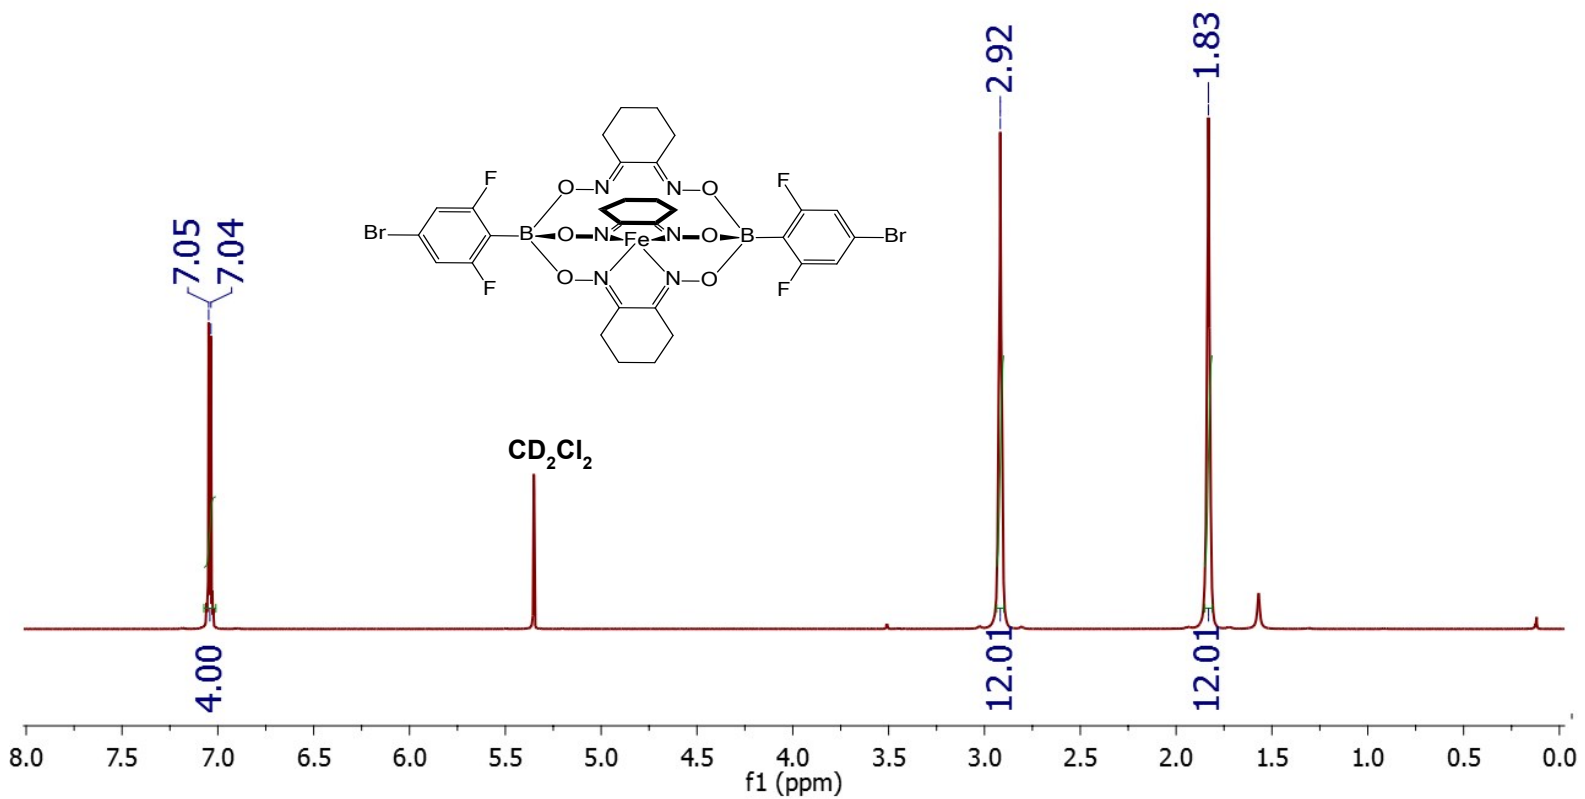

**Fig. S1.**  $^1\text{H}$  NMR spectrum of **CC2** recorded in  $\text{CD}_2\text{Cl}_2$

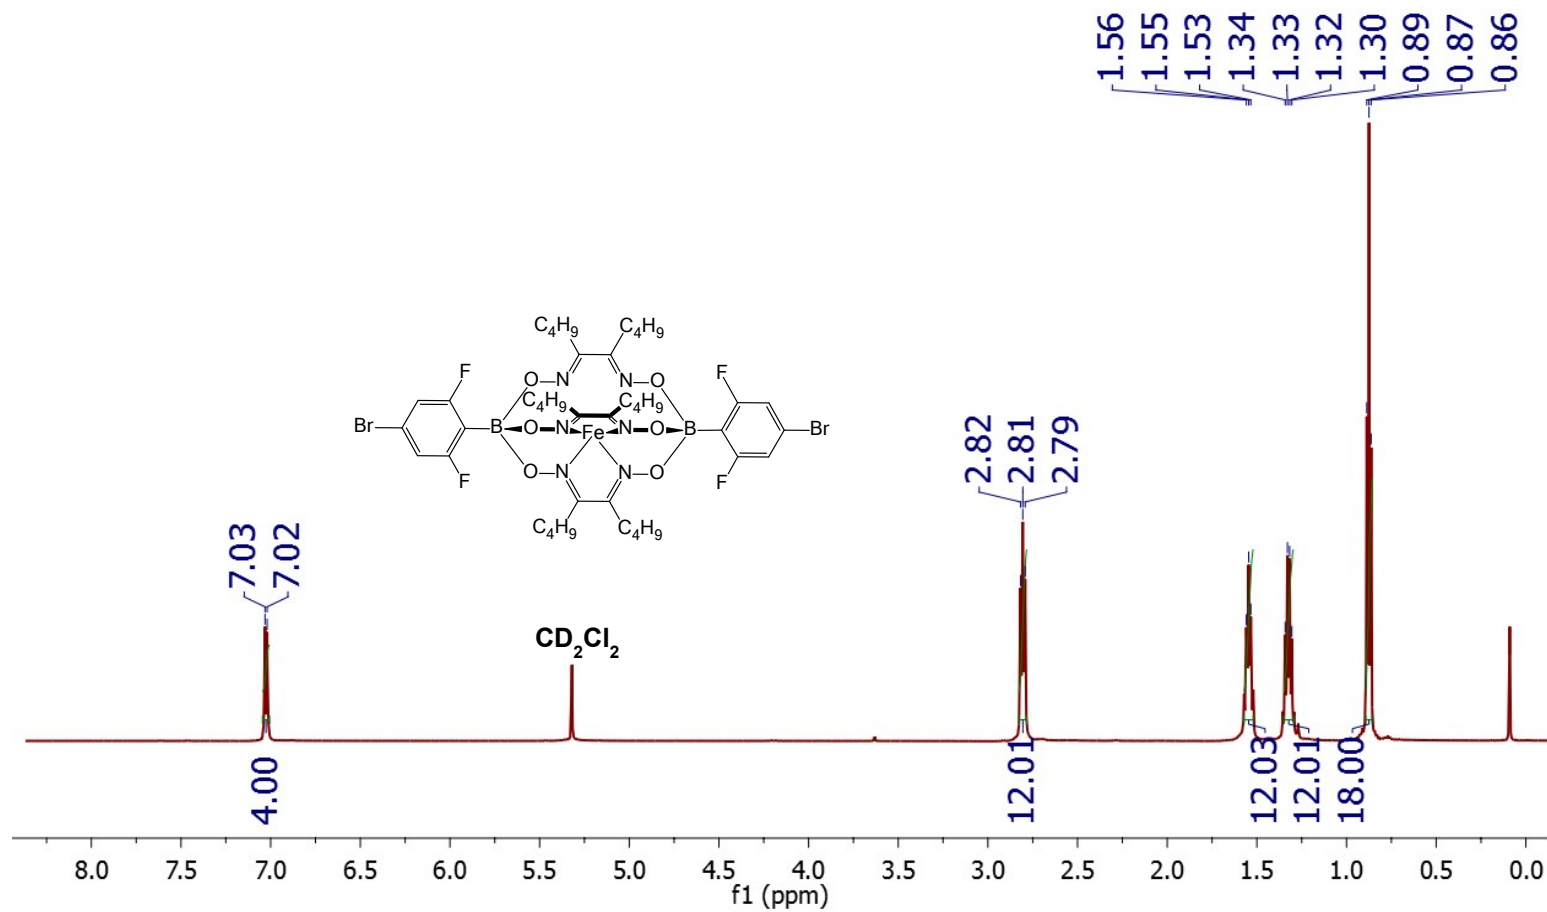

**Fig. S2.**  $^1\text{H}$  NMR spectrum of **CC3** recorded in  $\text{CD}_2\text{Cl}_2$

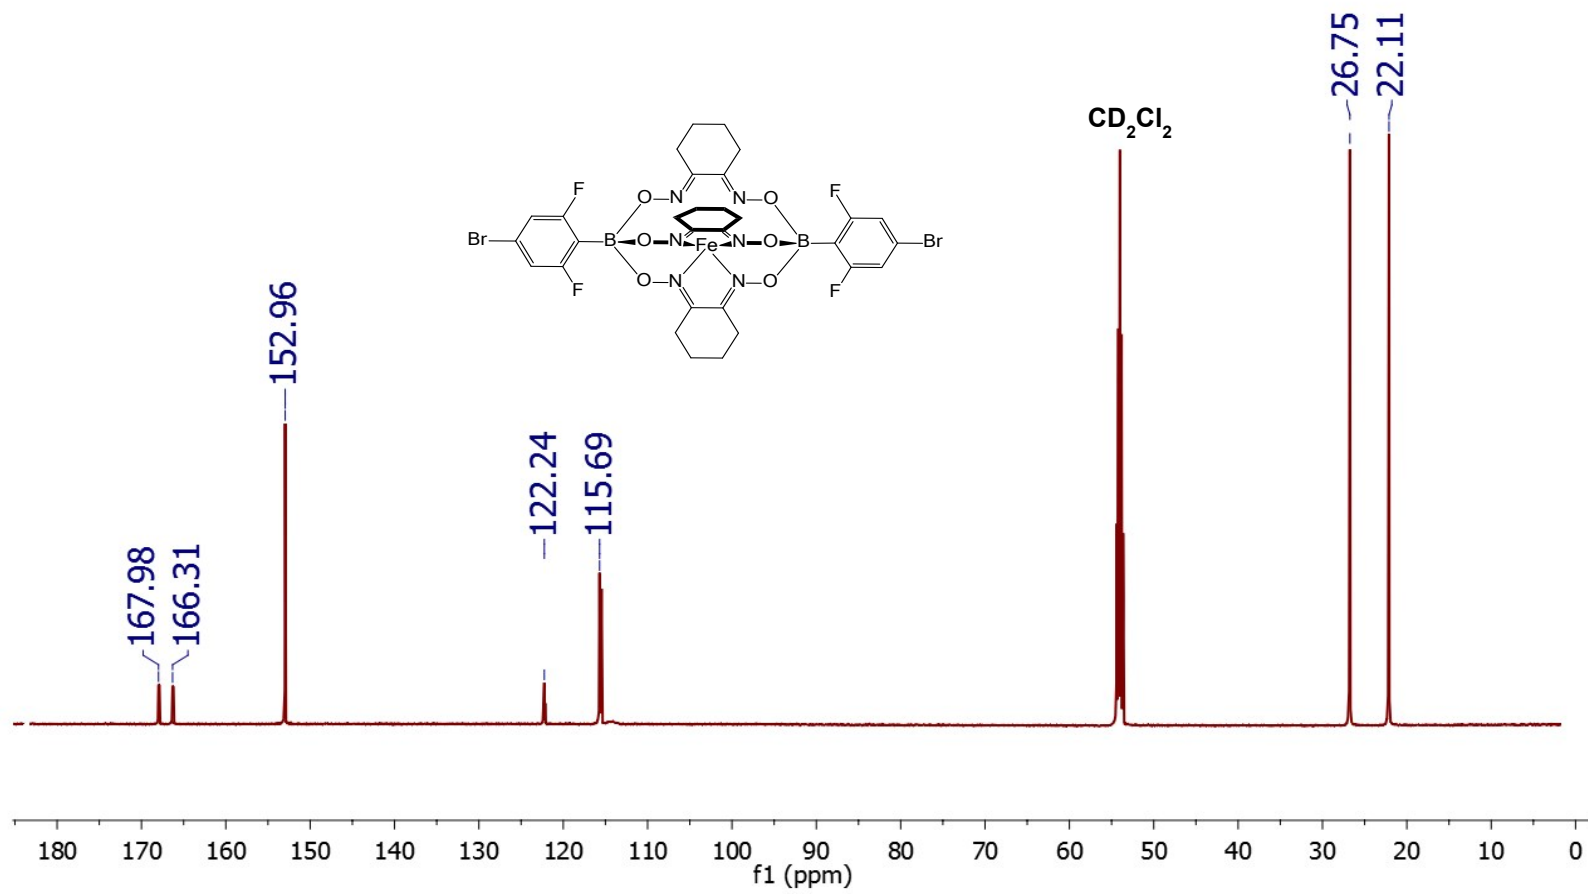

**Fig. S3.**  $^{13}\text{C}$  NMR spectrum of **CC2** recorded in  $\text{CD}_2\text{Cl}_2$

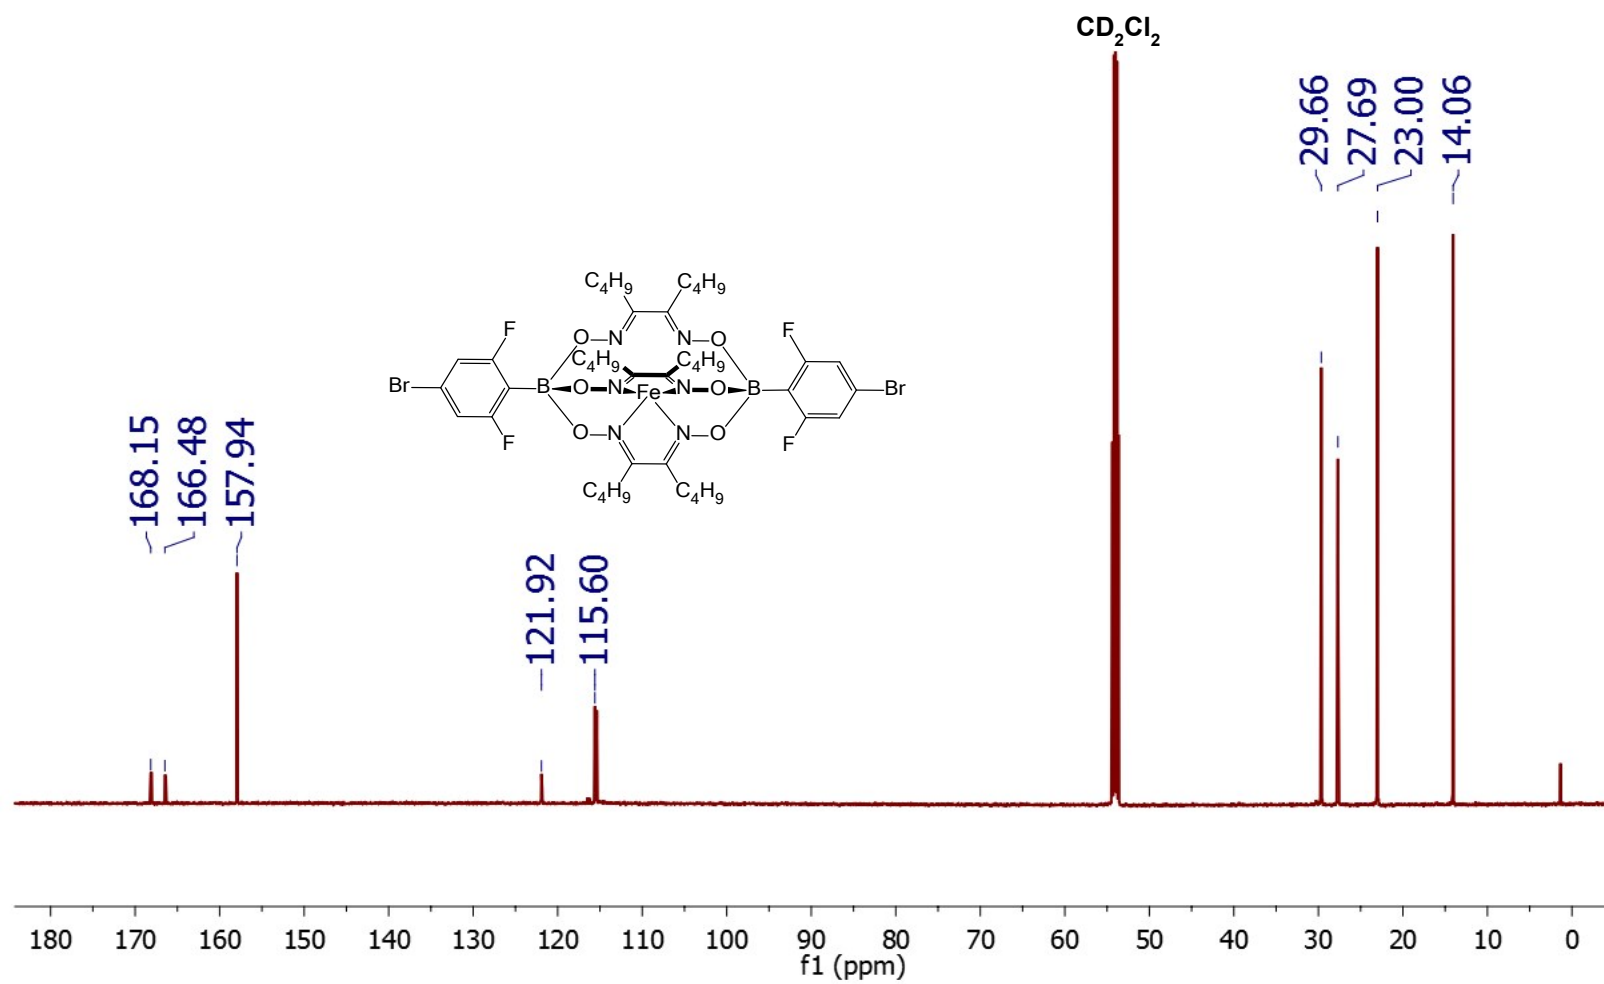

**Fig. S4.**  $^{13}\text{C}$  NMR spectrum of **CC3** recorded in  $\text{CD}_2\text{Cl}_2$

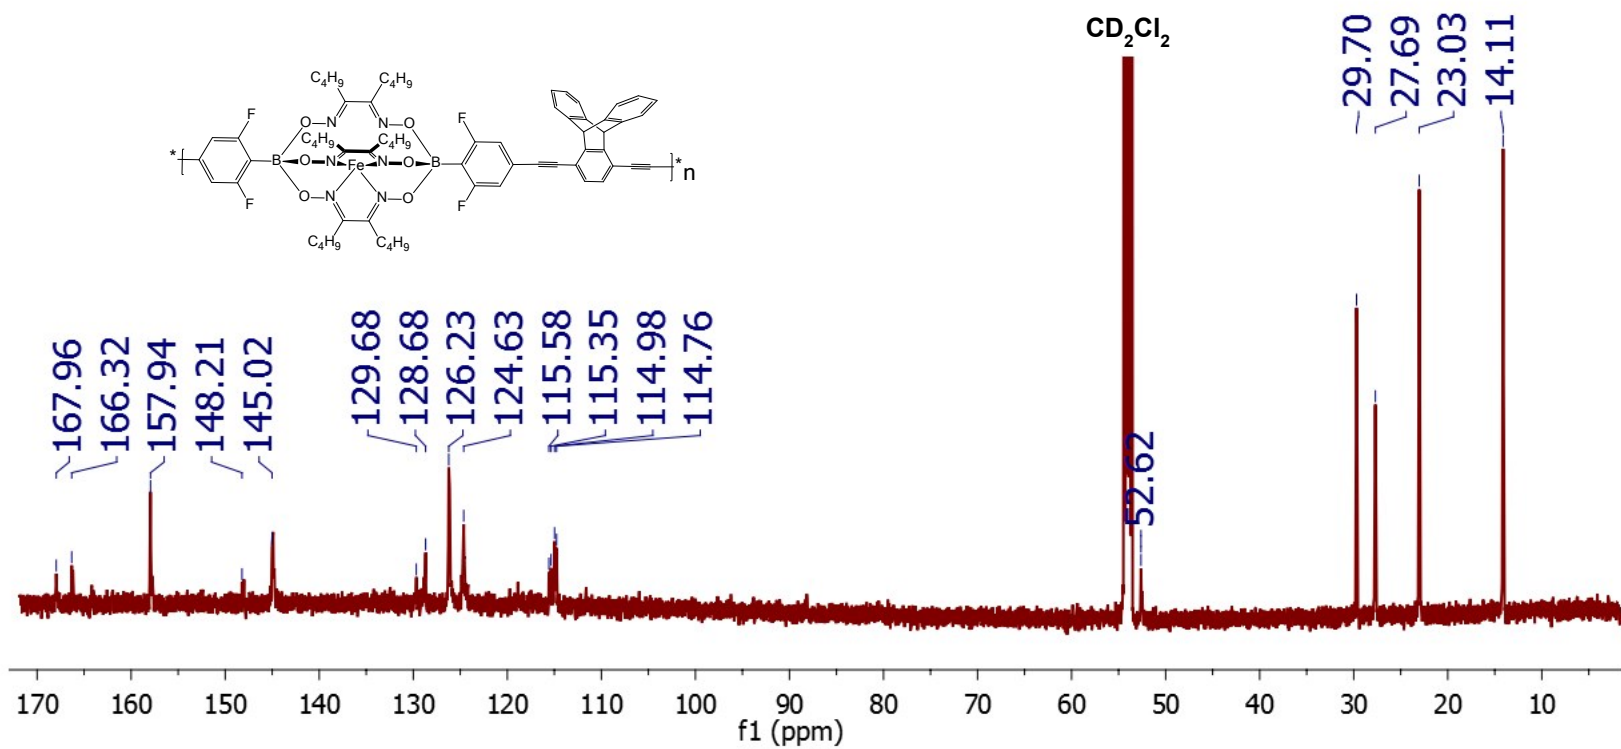

**Fig. S5.**  $^{13}\text{C}$  NMR spectrum of **CCP3** recorded in  $\text{CD}_2\text{Cl}_2$

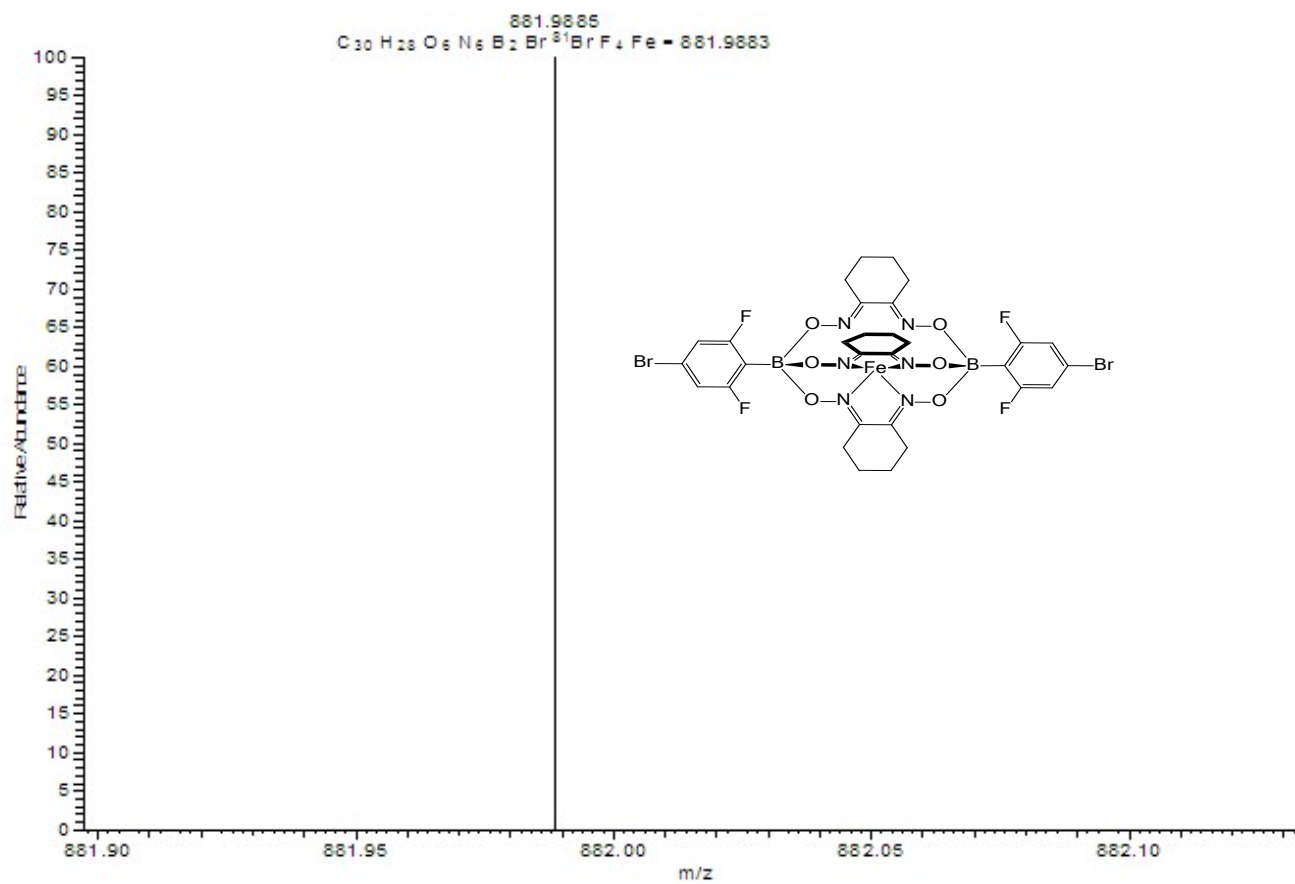

**Fig. S6.** EI-HRMS spectrum of **CC2**

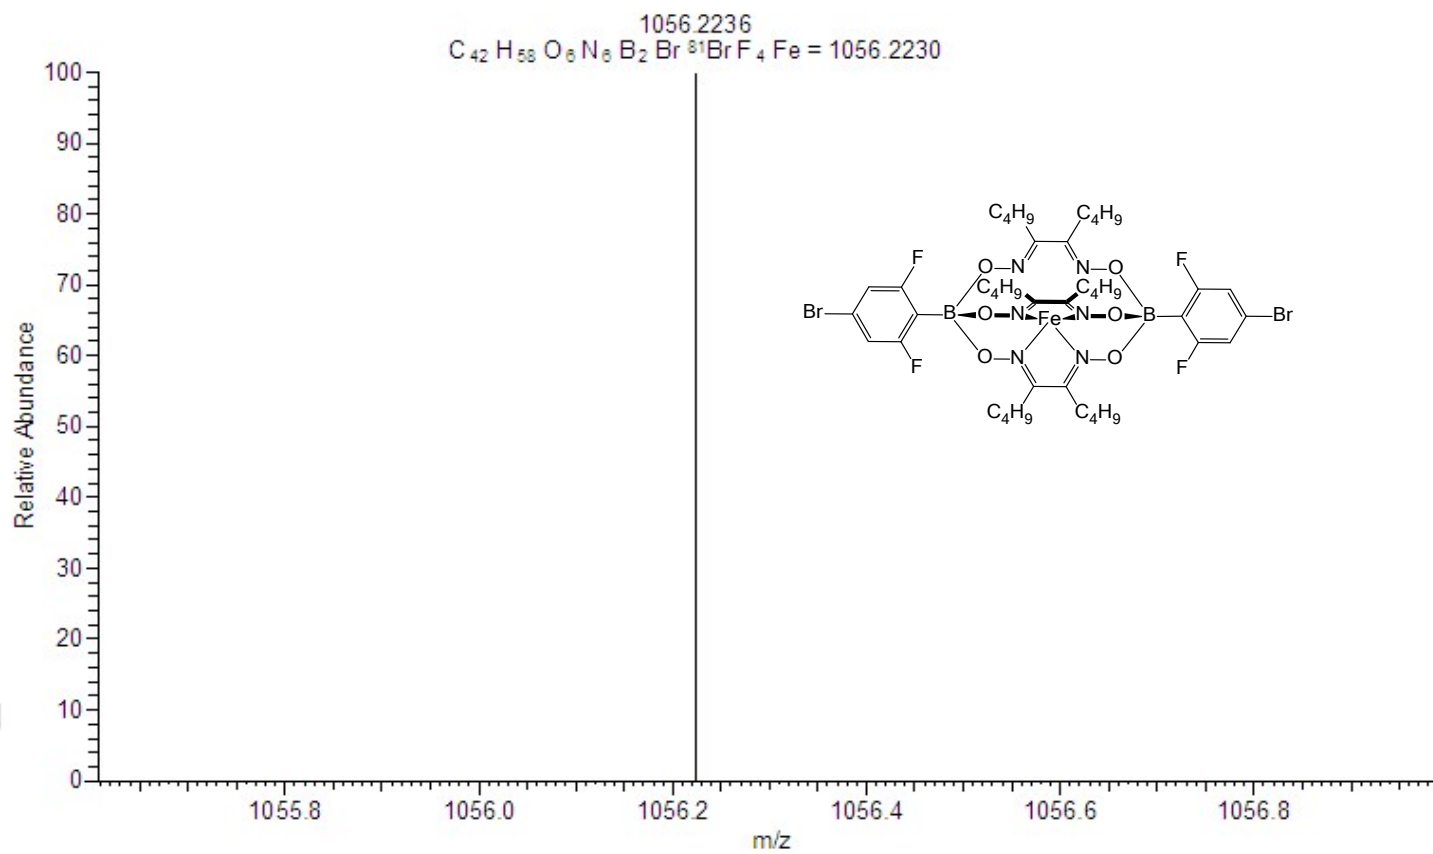

Fig. S7. EI-HRMS spectrum of **CC3**



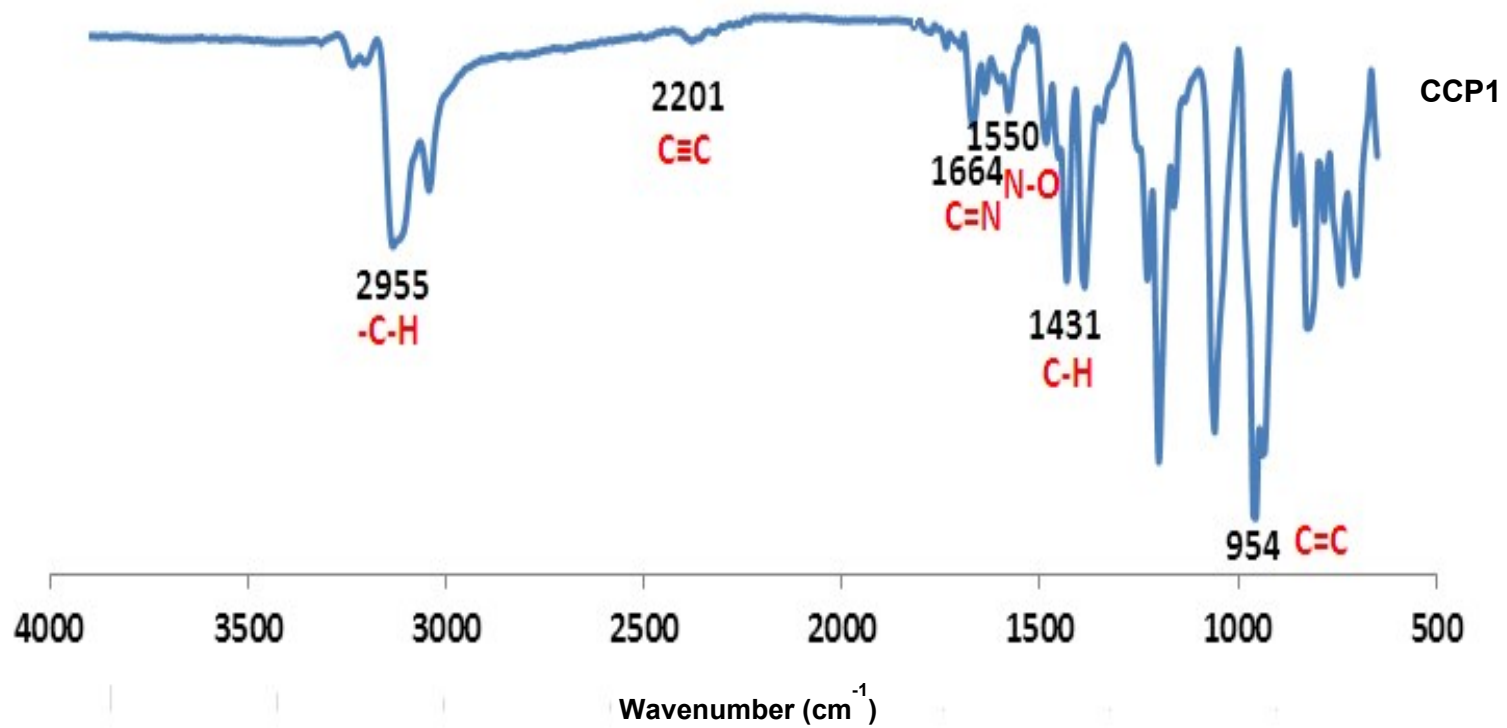

Fig. S8. FTIR spectrum of CCP1

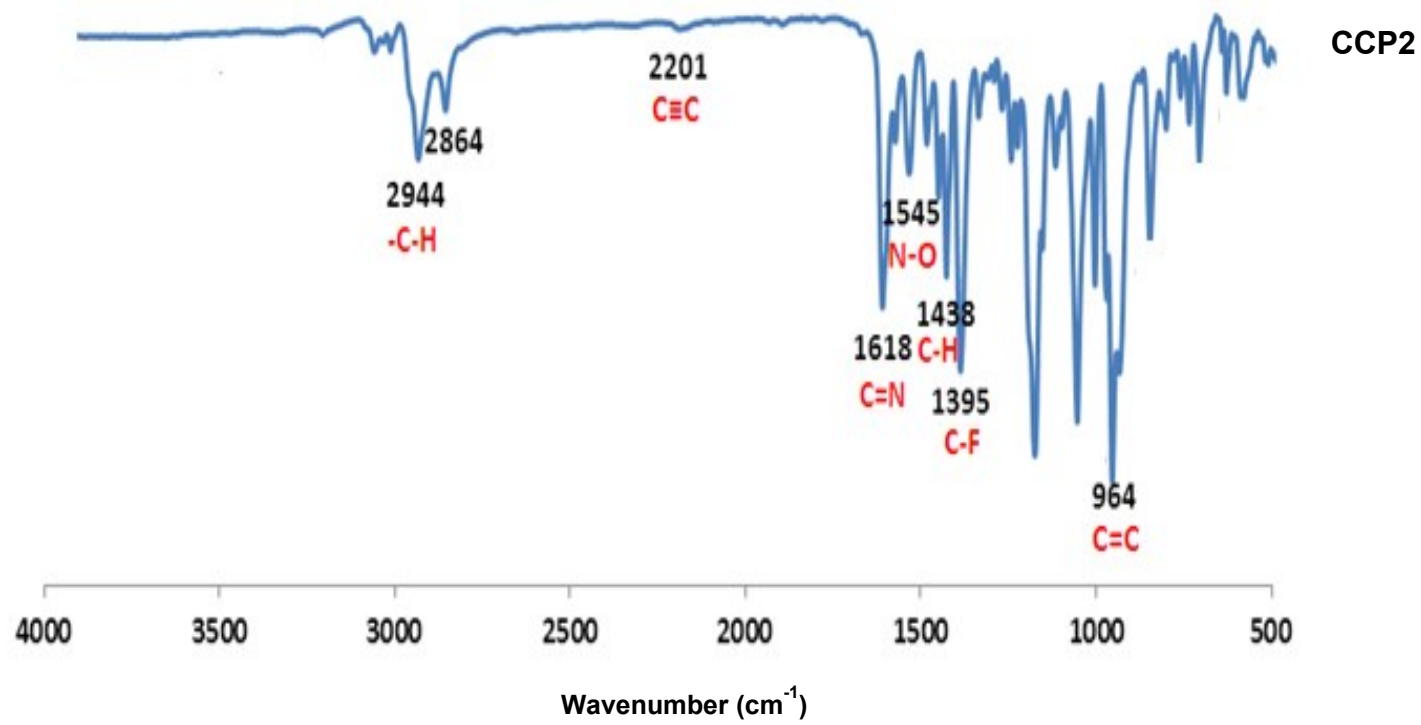

**Fig. S9.** FTIR spectrum of **CCP2**

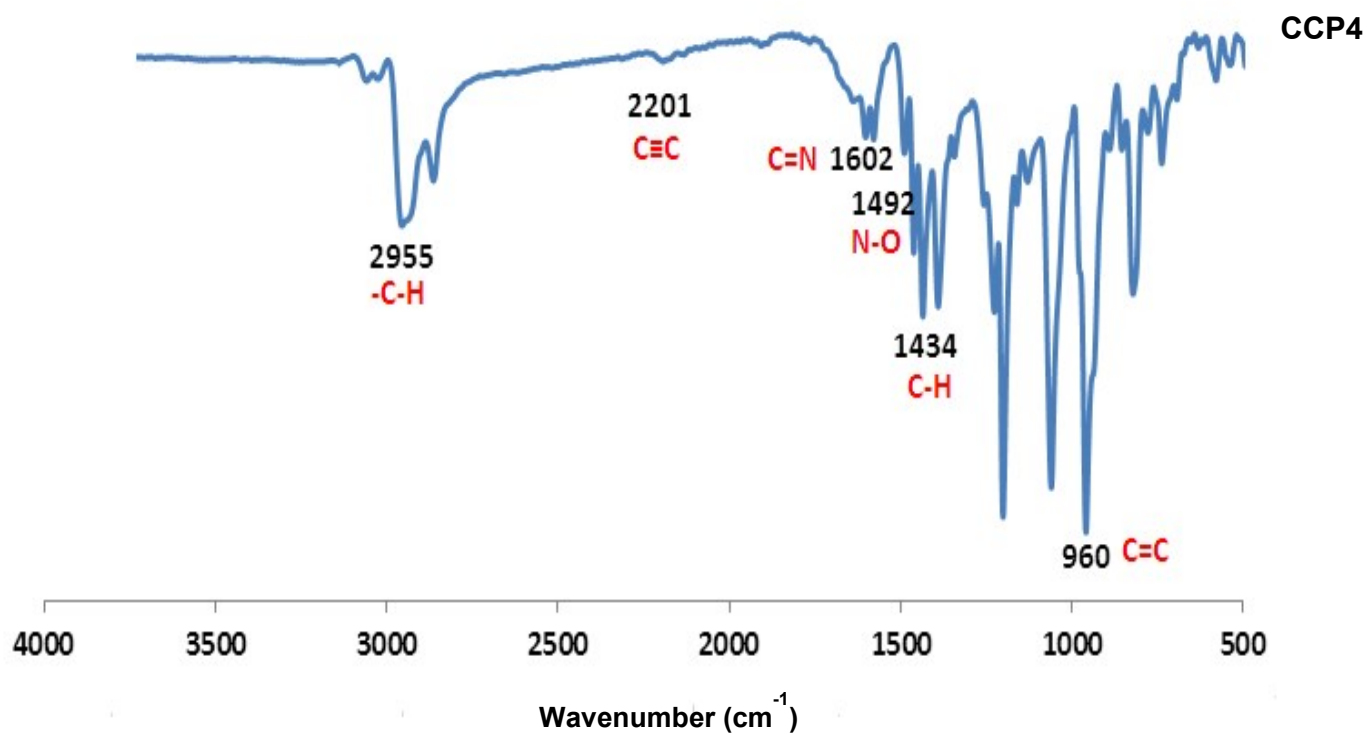

**Fig. S10.** FTIR spectrum of **CCP4**

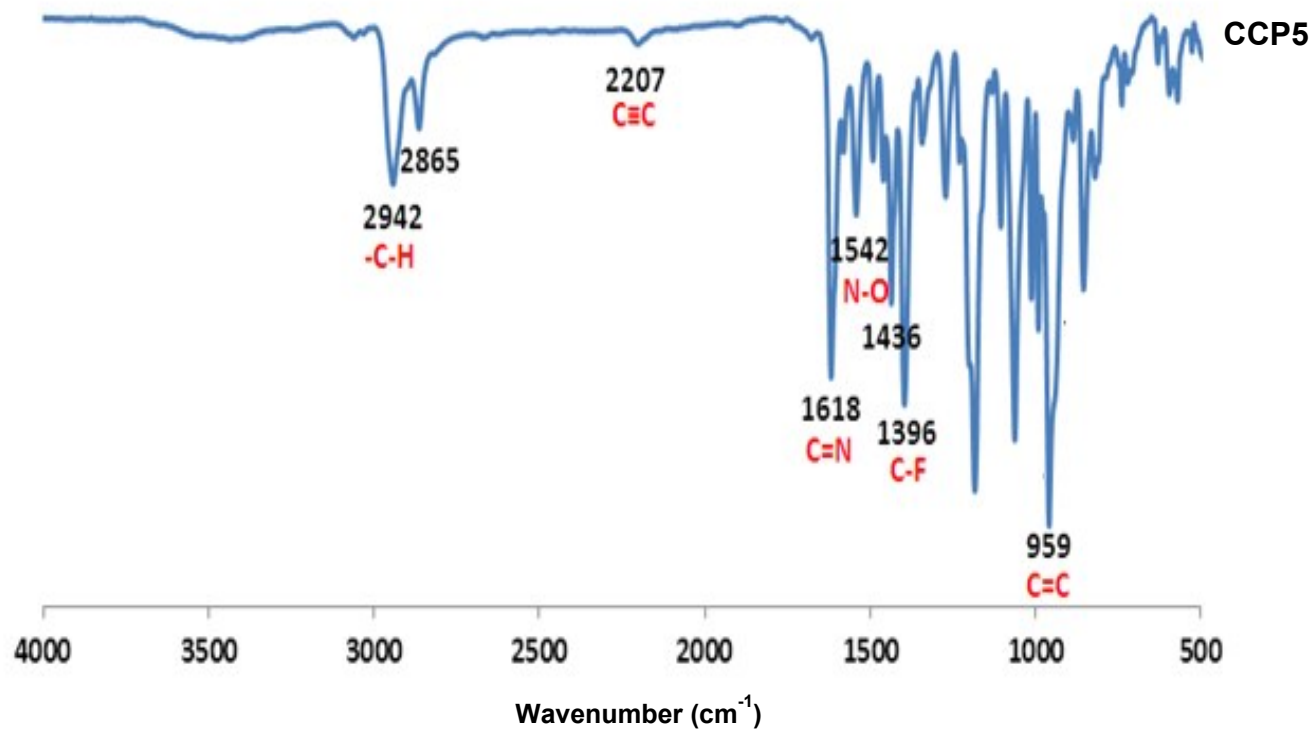

Fig. S11. FTIR spectrum CCP5

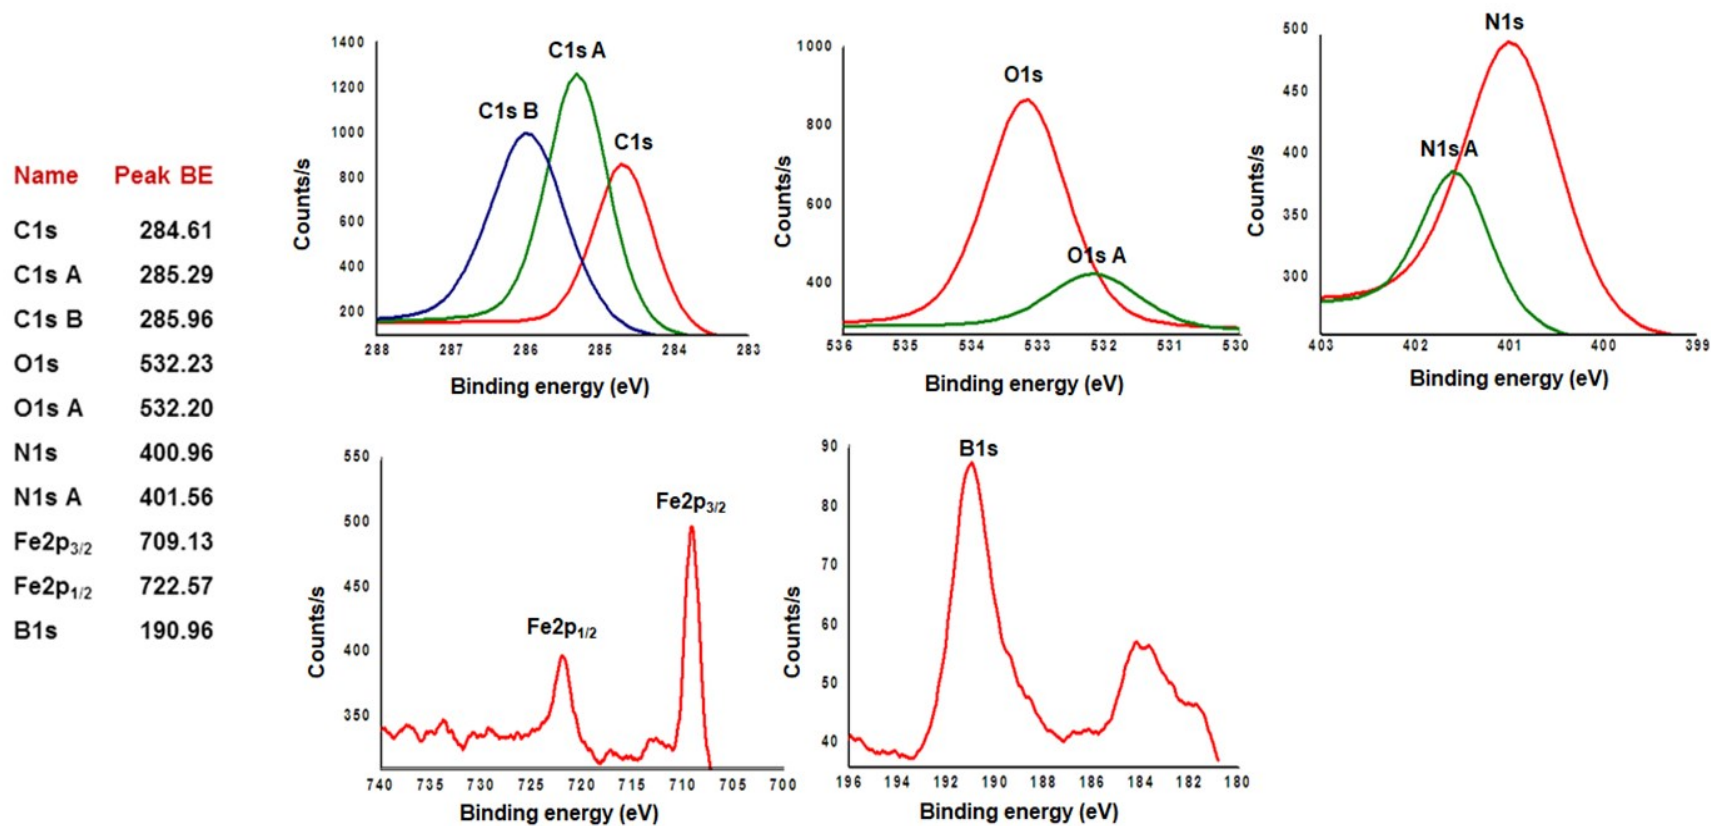

**Fig. S12.** High-resolution XPS spectra of C1s, O1s, N1s, Fe2p and B1s of **CCP1**.

| Name                | Peak BE |
|---------------------|---------|
| C1s                 | 284.64  |
| C1s A               | 285.30  |
| C1s B               | 285.96  |
| C1s C               | 291.37  |
| O1s                 | 532.96  |
| O1s A               | 532.22  |
| N1s                 | 400.61  |
| Fe2p <sub>3/2</sub> | 709.23  |
| Fe2p <sub>1/2</sub> | 722.55  |
| F1s                 | 686.63  |
| B1s                 | 191.21  |

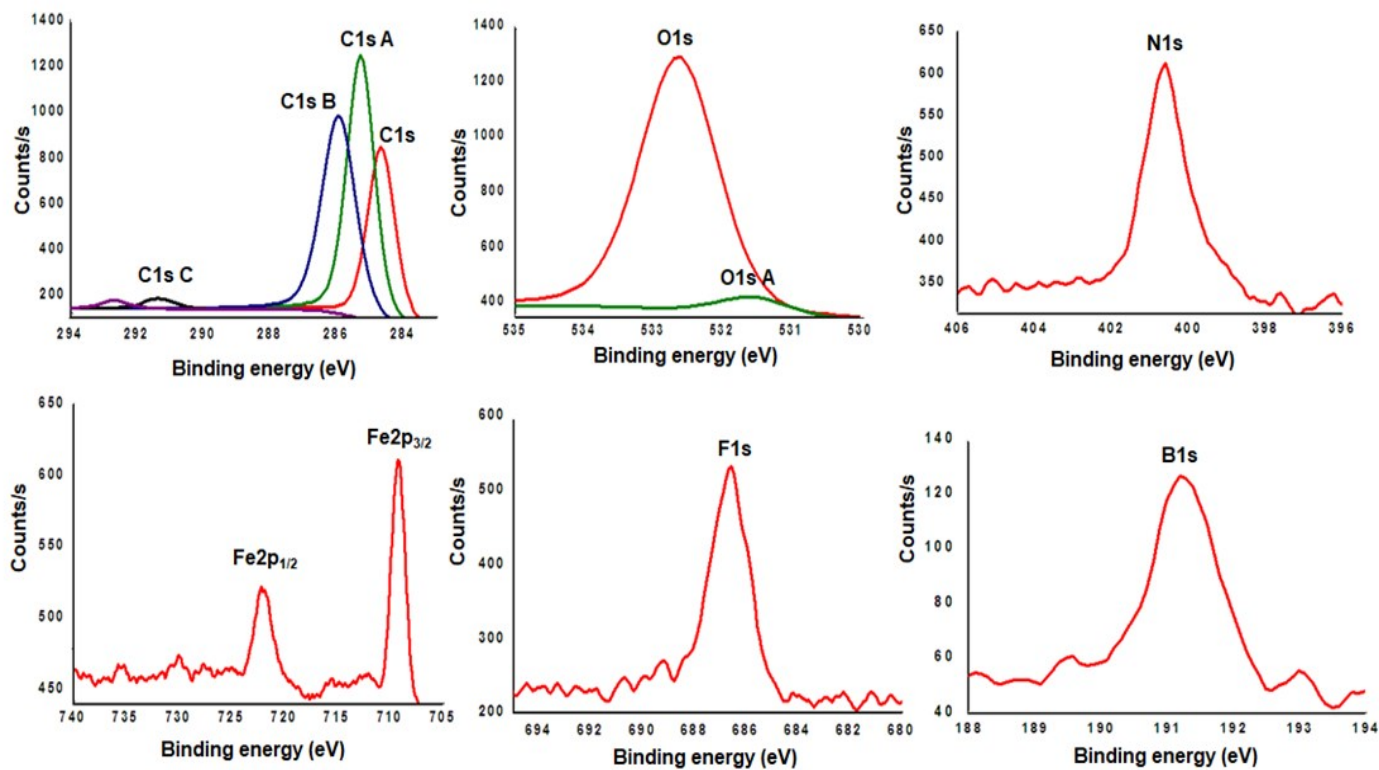

**Fig. S13.** High-resolution XPS spectra of C1s, O1s, N1s, Fe2p, F1s and B1s of **CCP2**.

| Name                | Peak BE |
|---------------------|---------|
| C1s                 | 284.59  |
| C1s A               | 285.31  |
| C1s B               | 285.99  |
| O1s                 | 532.85  |
| O1s A               | 532.25  |
| N1s                 | 400.61  |
| Fe2p <sub>3/2</sub> | 709.31  |
| Fe2p <sub>1/2</sub> | 722.55  |
| B1s                 | 191.25  |

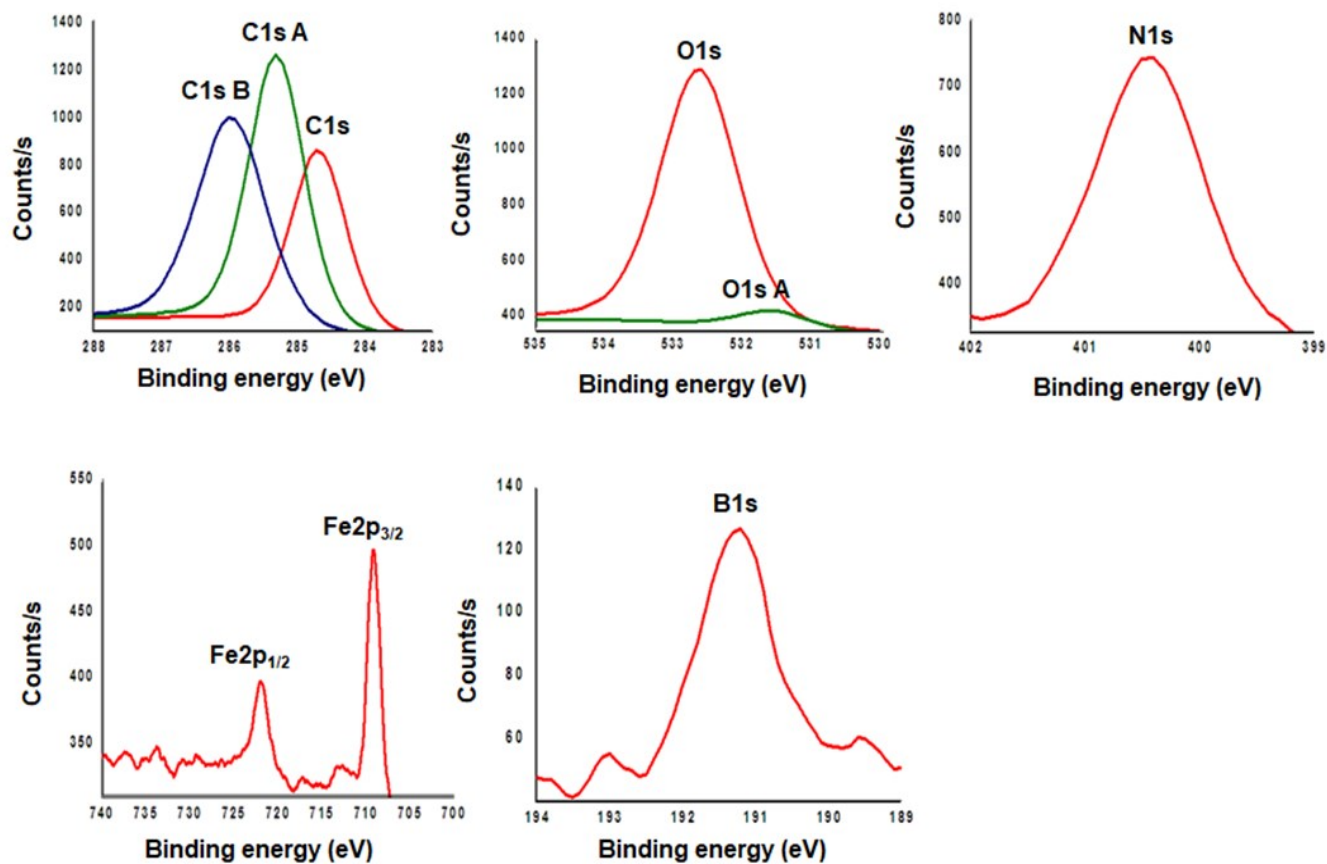

**Fig. S14.** High-resolution XPS spectra of C1s, O1s, N1s, Fe2p and B1s of **CCP4**

| Name                | Peak BE |
|---------------------|---------|
| C1s                 | 284.67  |
| C1s A               | 285.27  |
| C1s B               | 287.01  |
| O1s                 | 532.40  |
| O1s A               | 531.57  |
| N1s                 | 400.42  |
| Fe2p <sub>3/2</sub> | 709.27  |
| Fe2p <sub>1/2</sub> | 722.01  |
| F1s                 | 686.72  |
| B1s                 | 191.23  |

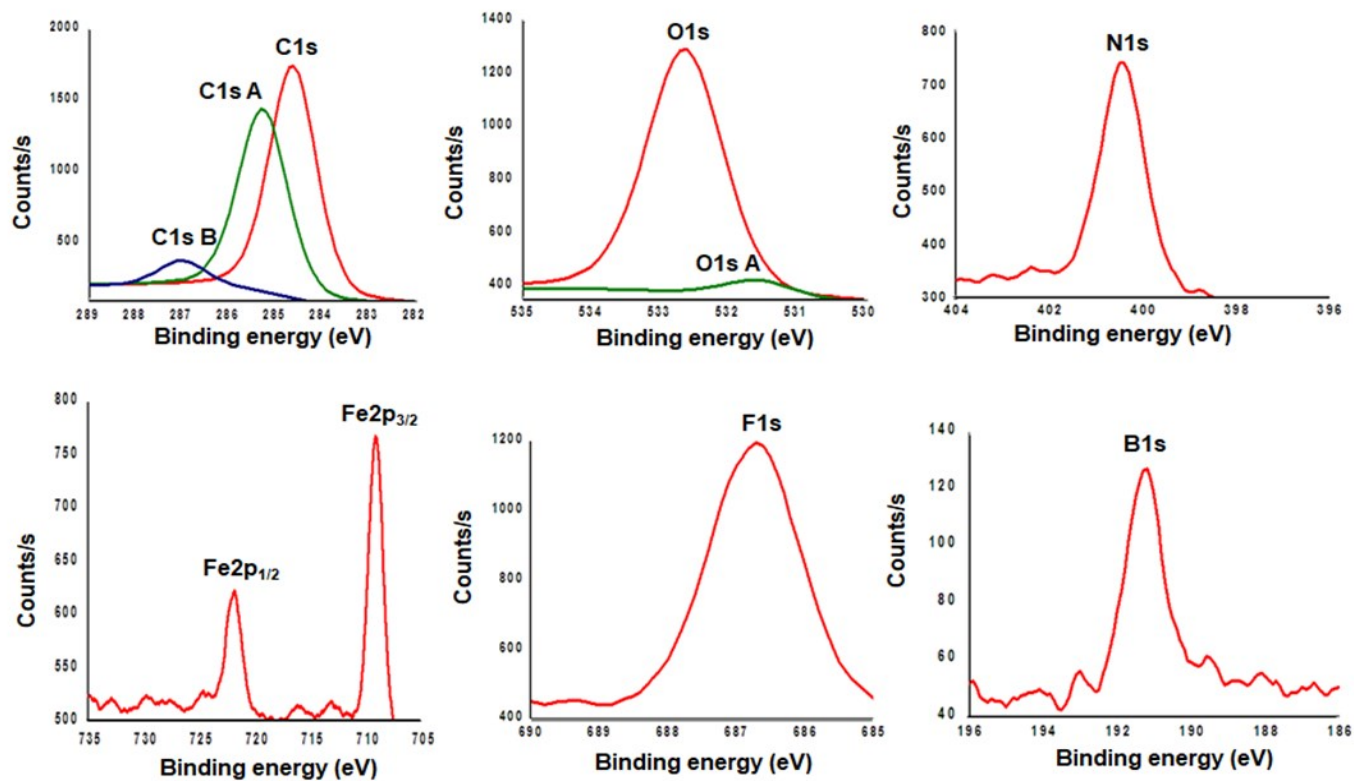

**Fig. S15.** High-resolution XPS spectra of C1s, O1s, N1s, Fe2p, F1s and B1s of **CCP5**



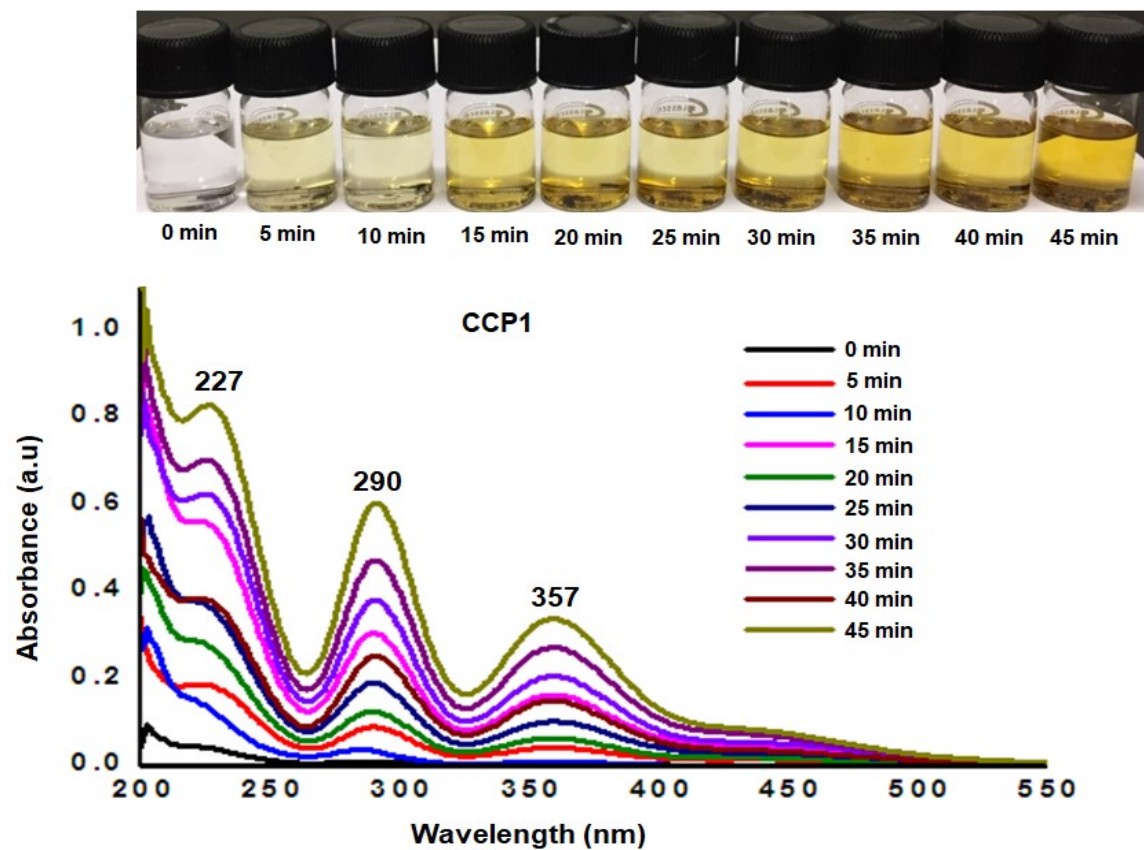

**Fig. S16.** UV-Vis absorption spectra upon immersion of I2@CCP1 in ethanol.

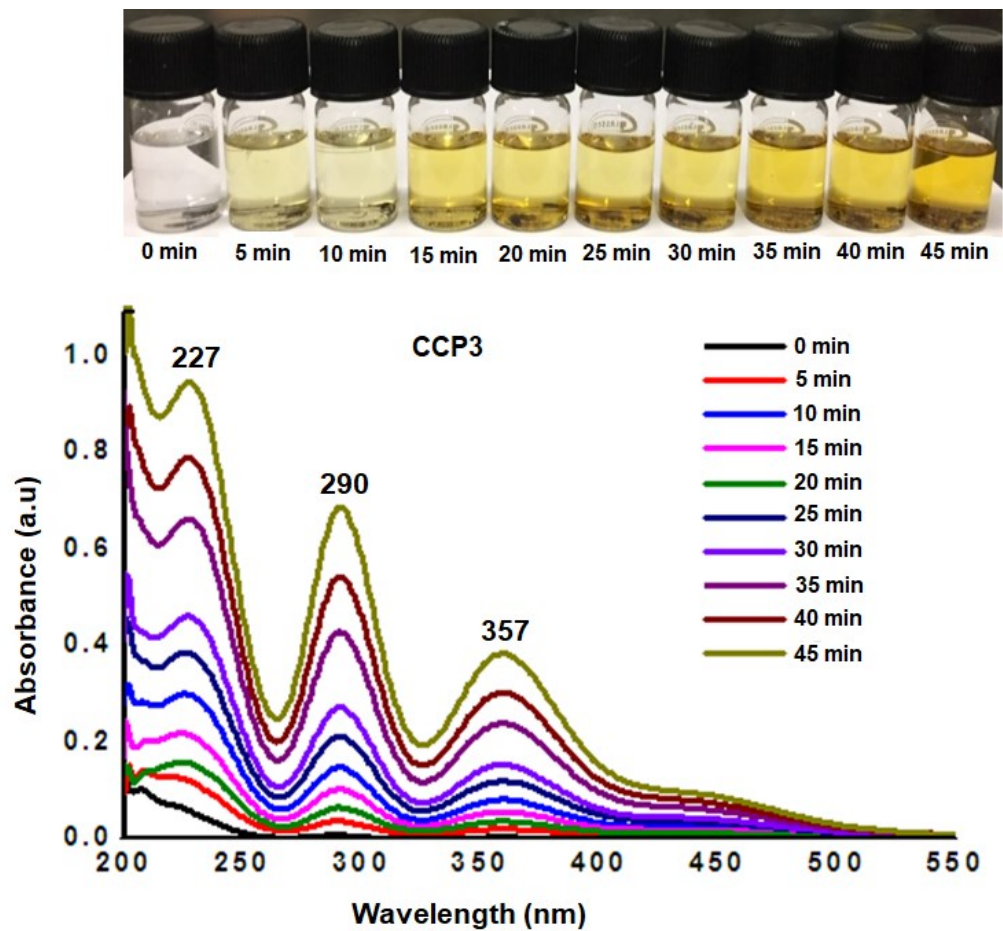

**Fig. S17.** UV-Vis absorption spectra upon immersion of I2@CCP3 in ethanol.

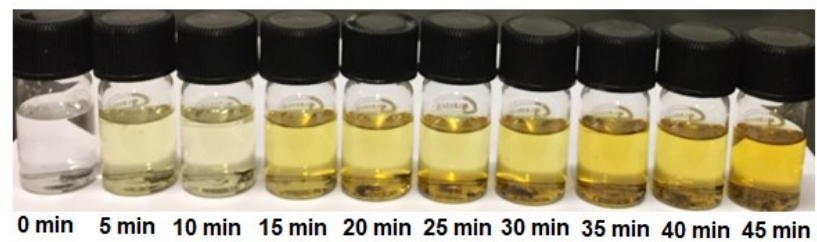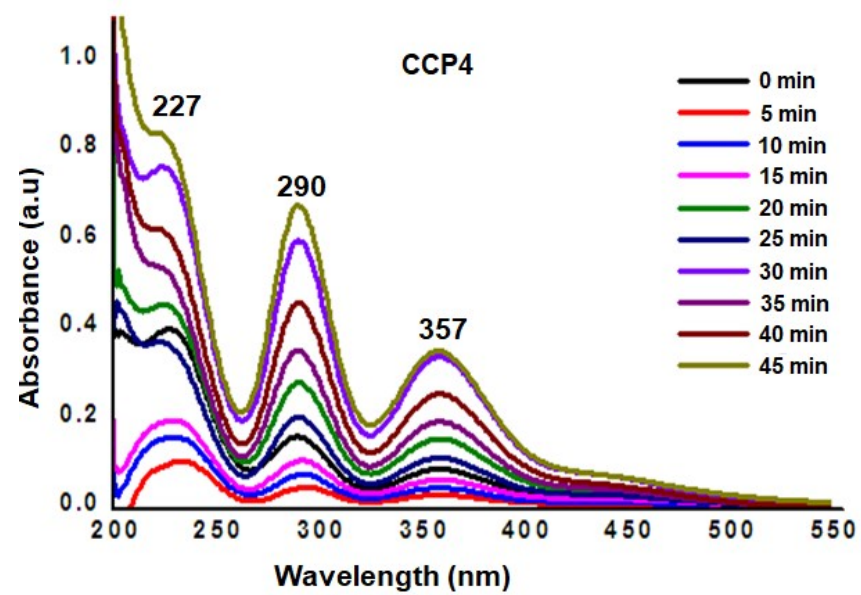

**Fig. S18.** UV-Vis absorption spectra upon immersion of I2@CCP4 in ethanol

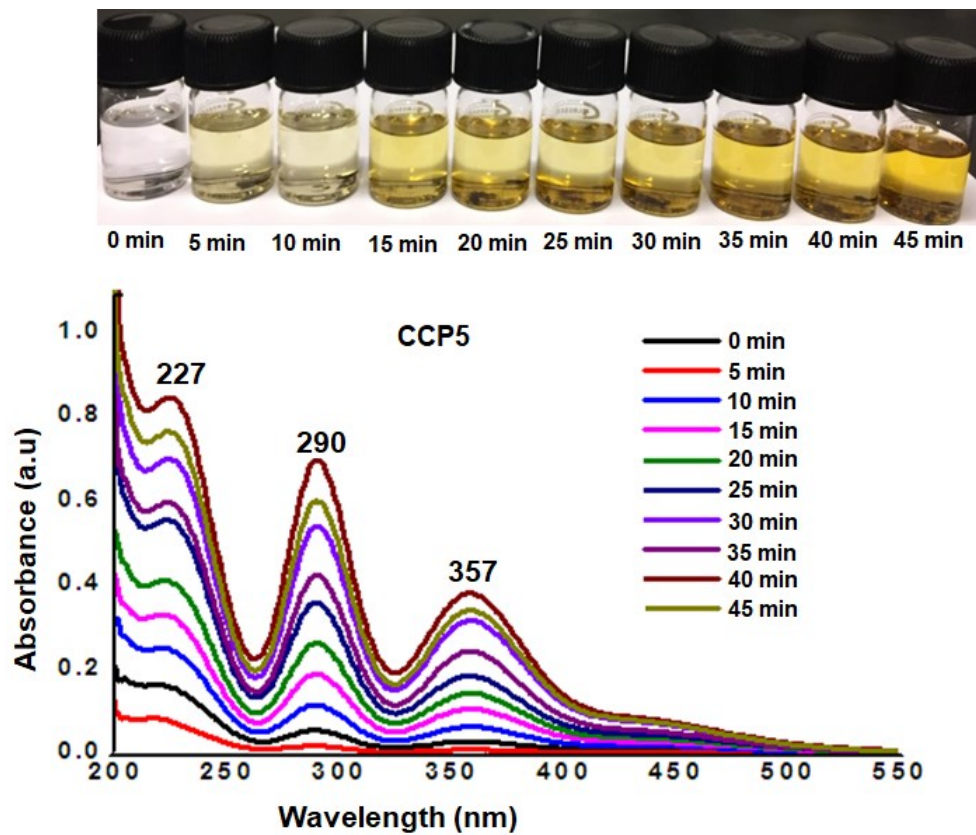

Fig. S19. UV-Vis absorption spectra upon immersion of I2@CCP5 in ethanol

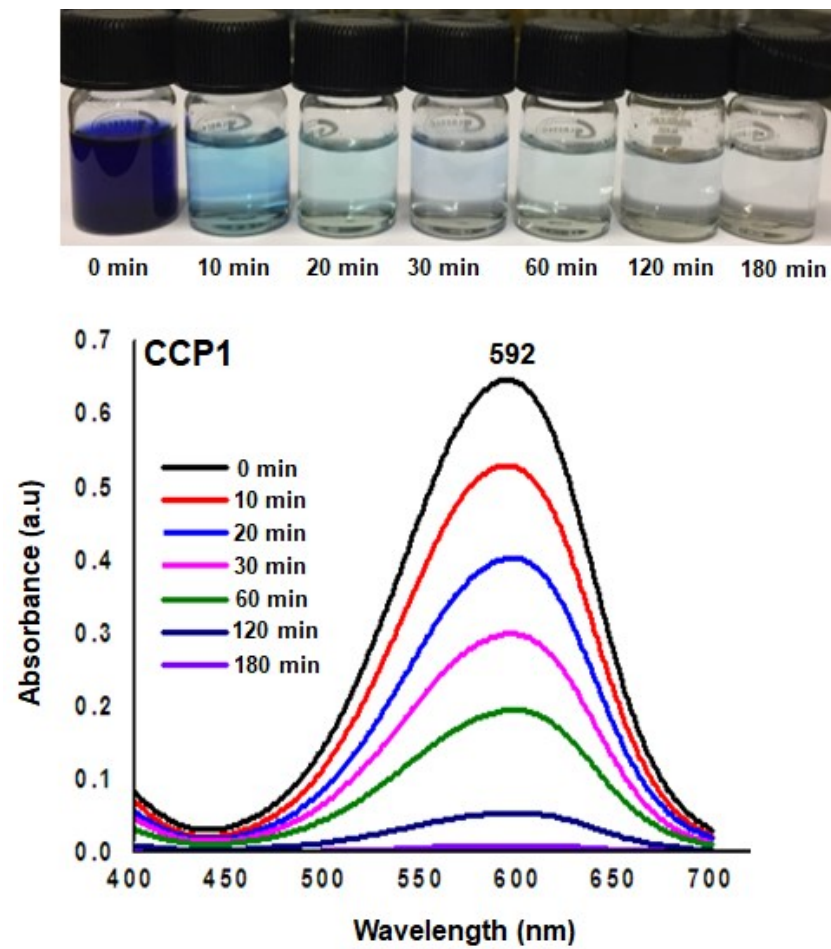

**Fig. S20.** UV-Vis absorption spectrum of aqueous solution MB in the presence of **CCP1** at various time intervals

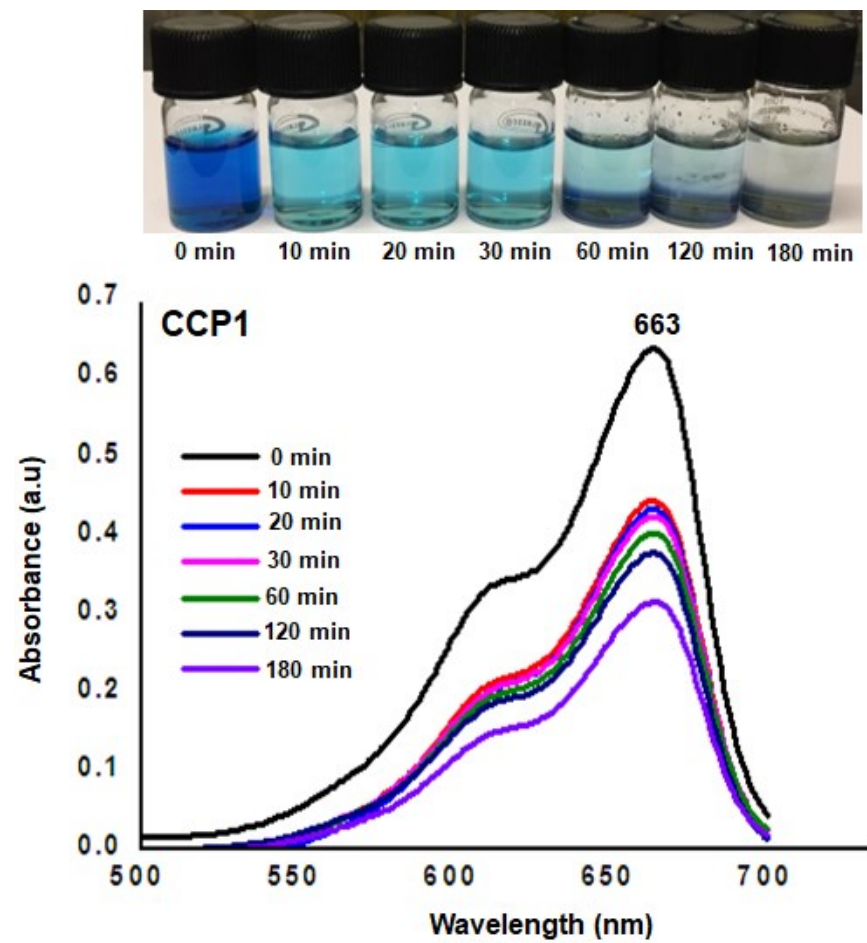

**Fig. S21.** UV-Vis absorption spectrum of aqueous solution MEB in the presence of **CCP1** at various time intervals

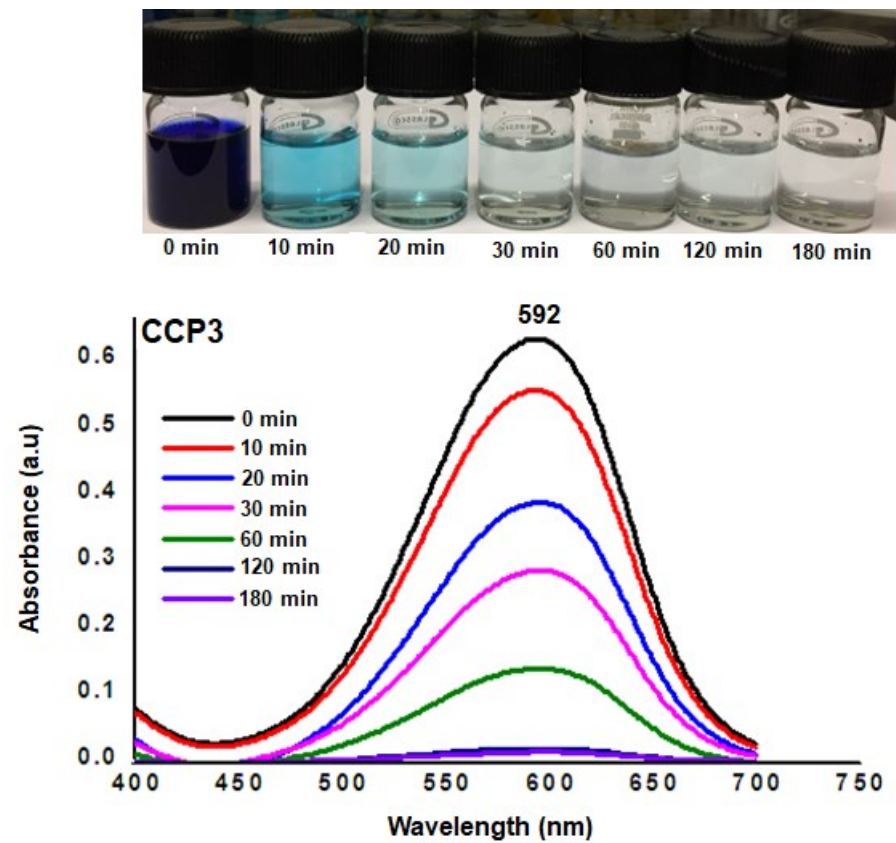

**Fig. S22.** UV-Vis absorption spectrum of aqueous solution MB in the presence of **CCP3** at various time intervals

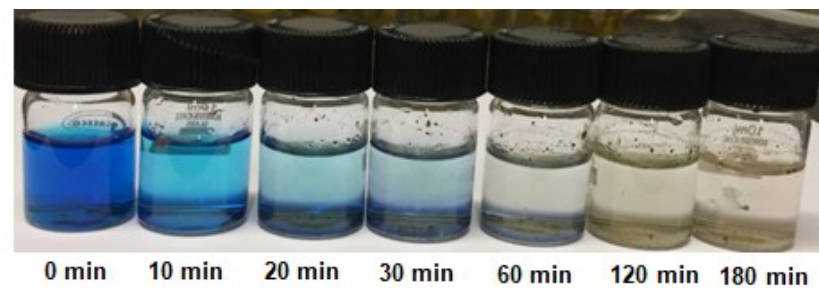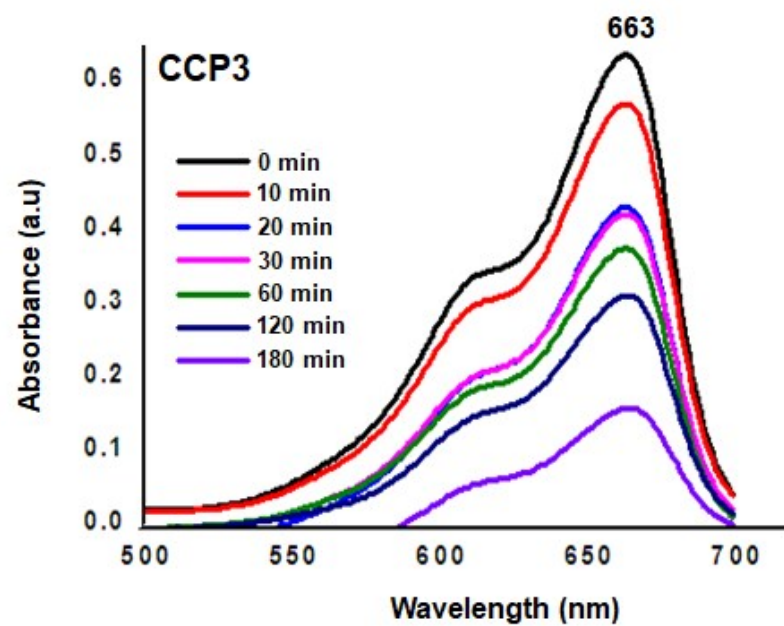

**Fig. S23.** UV-Vis absorption spectrum of aqueous solution MEB in the presence of **CCP3** at various time intervals



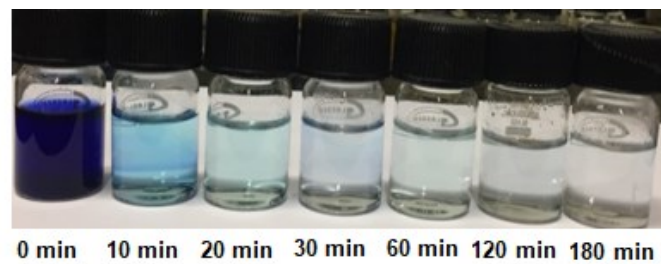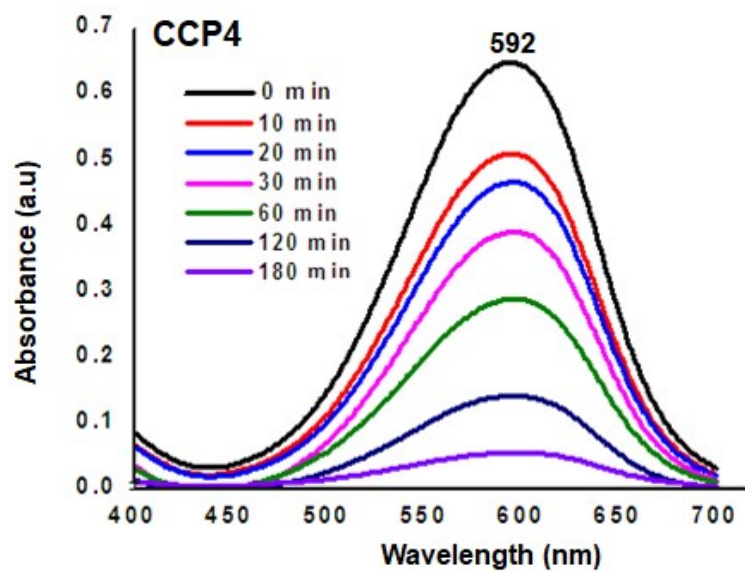

**Fig. S24.** UV-Vis absorption spectrum of aqueous solution MB in the presence of **CCP4** at various time intervals

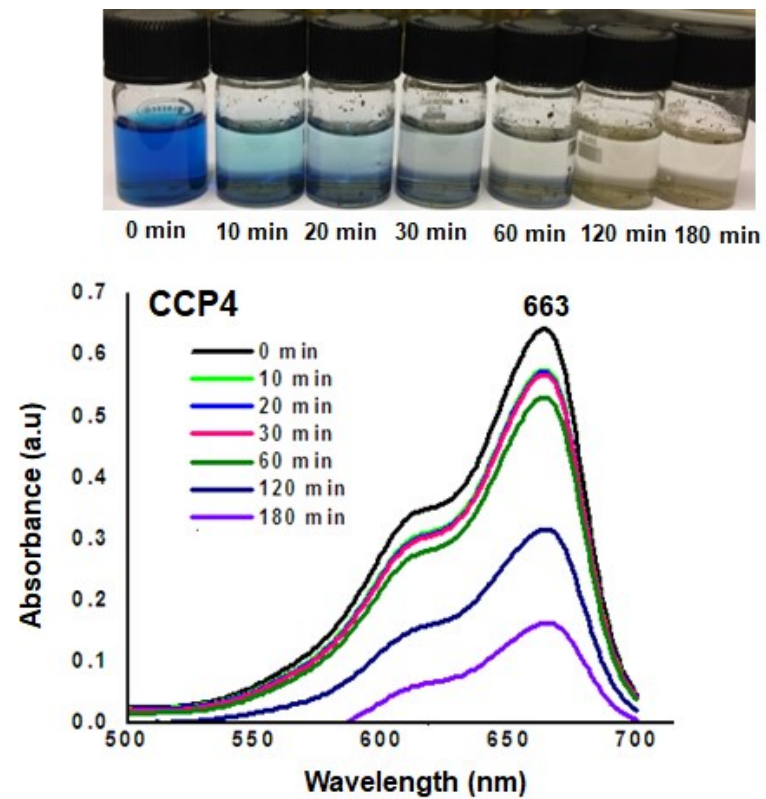

**Fig. S25.** UV-Vis absorption spectrum of aqueous solution MEB in the presence of **CCP4** at various time intervals

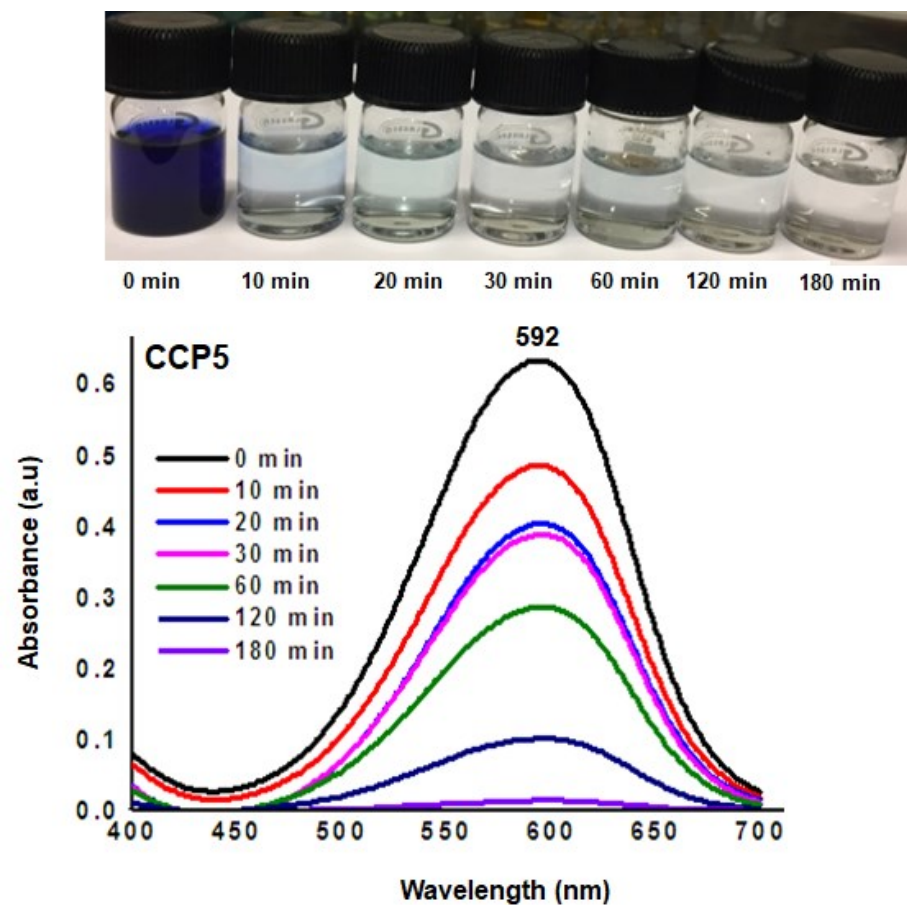

**Fig. S26.** UV-Vis absorption spectrum of aqueous solution MB in the presence of **CCP5** at various time intervals

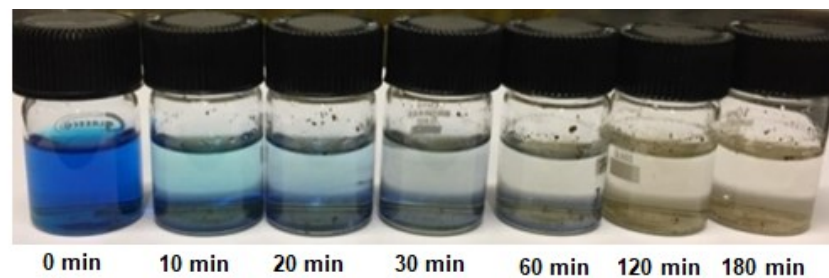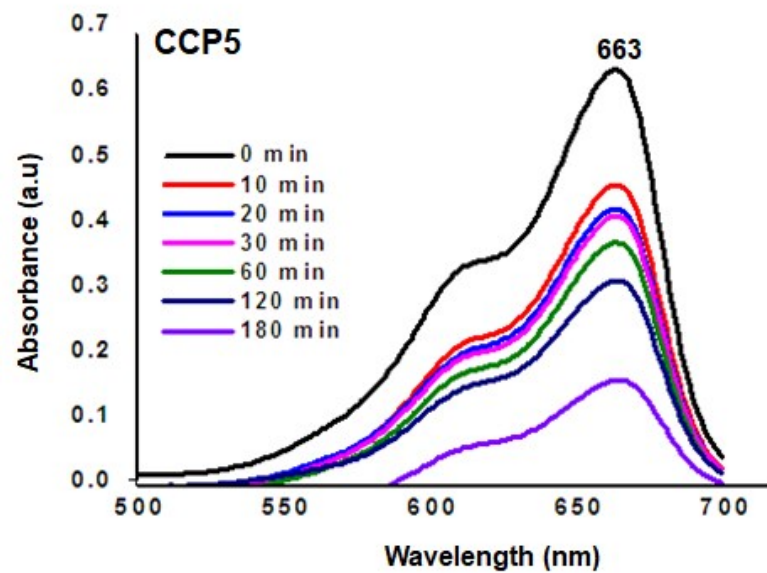

**Fig. S27.** UV-Vis absorption spectrum of aqueous solution MEB in the presence of **CCP5** at various time intervals
